# Supplementary material
Source: Springer Nature journal article supplement (https://www.springermedizin.de/resource/supplementary/12985_2011_1869_MOESM2_ESM.pdf/9610708)

**A**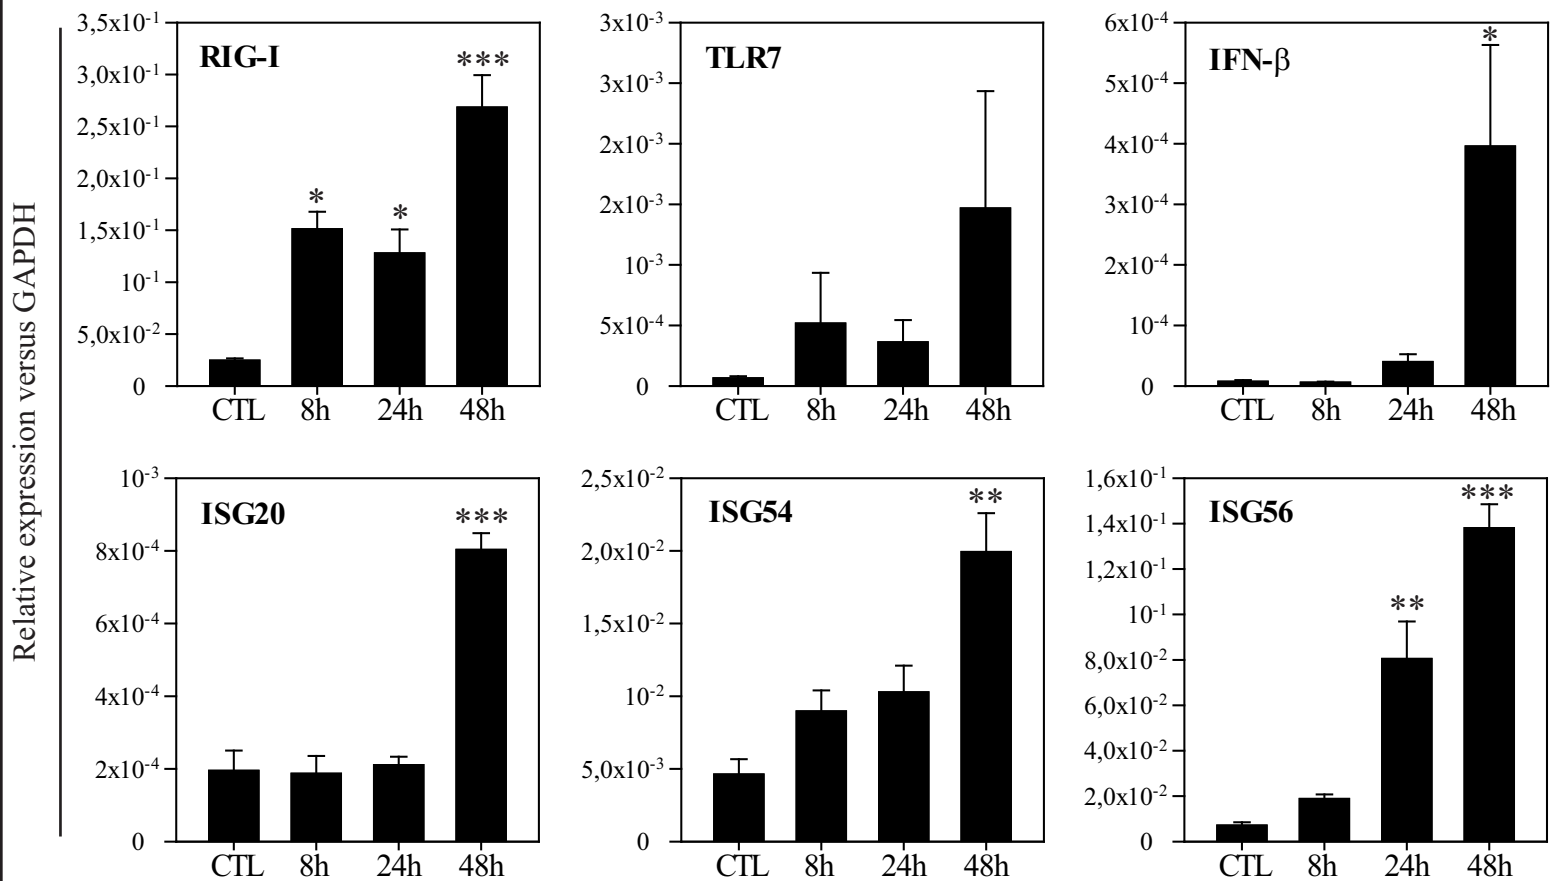**B**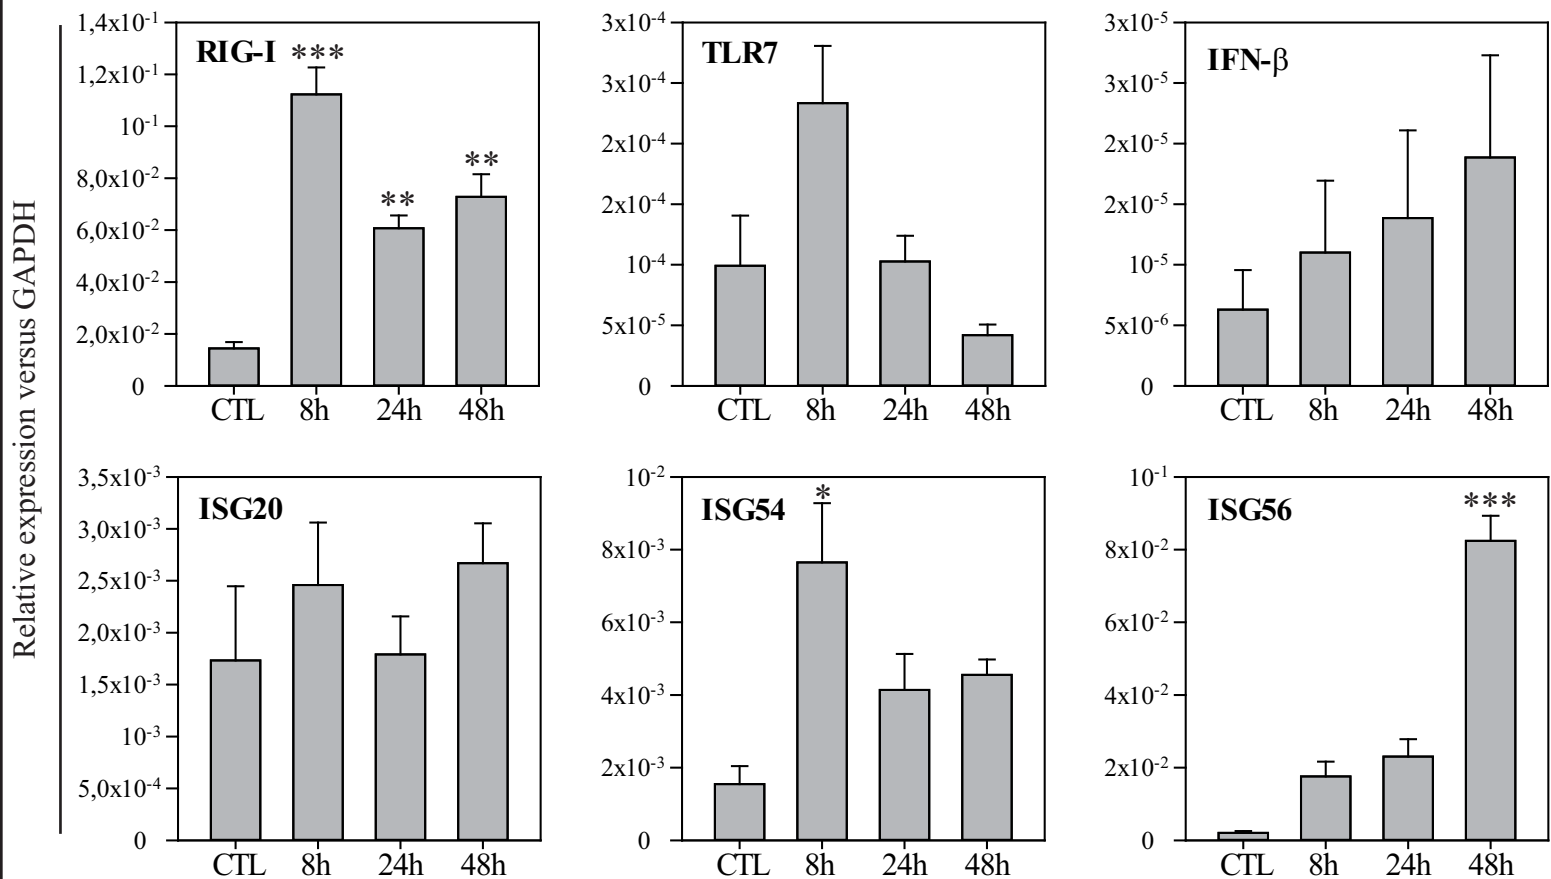

Supplement: MOESM2 [file 9610708]
